# Supplementary material for: Effects of behavioral response and vaccination policy on epidemic spreading - an approach based on evolutionary-game dynamics
Source: PubMed Central journal article supplement — Sci Rep. 2014 Jul 11;4:5666. doi: 10.1038/srep05666 (PMC4092348; doi:10.1038/srep05666), 2014-07-11
Supplement: srep05666-s1.pdf [file srep05666-s1.pdf]

# Effects of behavioral response and vaccination policy on epidemic spreading - an approach based on evolutionary-game dynamics

Hai-Feng Zhang,<sup>1,2,3</sup> Zhi-Xi Wu,<sup>4</sup> Ming Tang,<sup>5</sup> and Ying-Cheng Lai<sup>2</sup>

<sup>1</sup>School of Mathematical Science, Anhui University, Hefei 230039, P. R. China

<sup>2</sup>School of Electrical, Computer and Energy Engineering, Arizona State University, Tempe, Arizona 85287, USA

<sup>3</sup>Department of Communication Engineering, North University of China, Taiyuan, Shan'xi 030051, P. R. China

<sup>4</sup>Institute of Computational Physics and Complex Systems, Lanzhou University, Lanzhou 730000, China

<sup>5</sup>Web Sciences Center, University of Electronic Science and Technology of China, Chengdu 611731, China

(Dated: June 3, 2014)

- [1] Ren, J., Wang, W. X., & Qi, F. Randomness enhances cooperation: a resonance-type phenomenon in evolutionary games. *Physical Review E* **75** (4), 045101 (2007).
- [2] Lü, L., Chen, D.-B. & Zhou, T. The small world yields the most effective information spreading. *New Journal of Physics* **13**(12), 123005 (2011).
- [3] Barabási, A.-L. & Albert, R. Emergence of scaling in random networks. *Science* **286**(5439), 509–512 (1999).
- [4] Newman, M. E., Strogatz, S. H., & Watts, D. J. Random graphs with arbitrary degree distributions and their applications. *Physical Review E*, **64** (2), 026118 (2001).

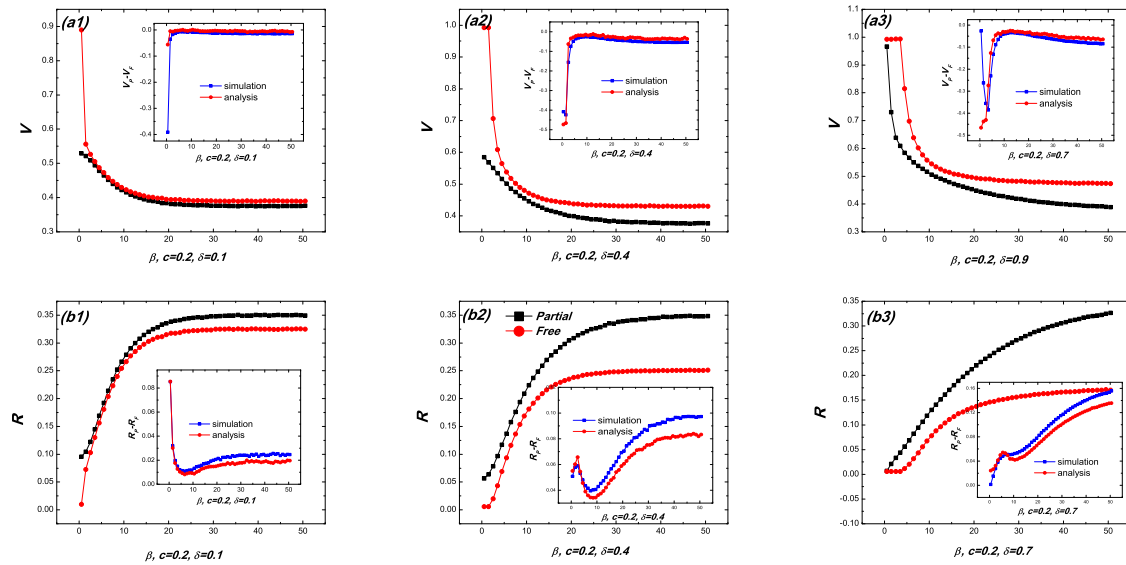

Figure S1: **Quantitative characterization of impacts of the selection strength  $\beta$  on epidemic spreading for partial- and free-subsidy policies for small vaccination cost.** For homogeneous small-world networks [1, 2] and cost of vaccination  $c = 0.2$ , vaccination coverage ( $V$ , top panels) and epidemic size ( $R$ , bottom panels) for the two subsidy policies for  $\delta = 0.1, 0.4$  and  $0.7$  (corresponding to the left, central, and right panels, respectively). Insets in the top panels show the difference in the vaccination coverage,  $V_P - V_F$ , between the partial- and free-subsidy policies. Insets in the bottom panels display the difference in epidemic size,  $R_P - R_F$ , between the two subsidy policies. Blue squares in the insets are simulation results, and the red circles are the theoretical predictions based on the mean-field method (see analysis in **Methods** in main text). Other parameters are: network size  $N = 1000$ , transmission rate  $\lambda = 0.072$ ,  $\mu = 0.25$  and average degree  $\bar{k} = 10$ .

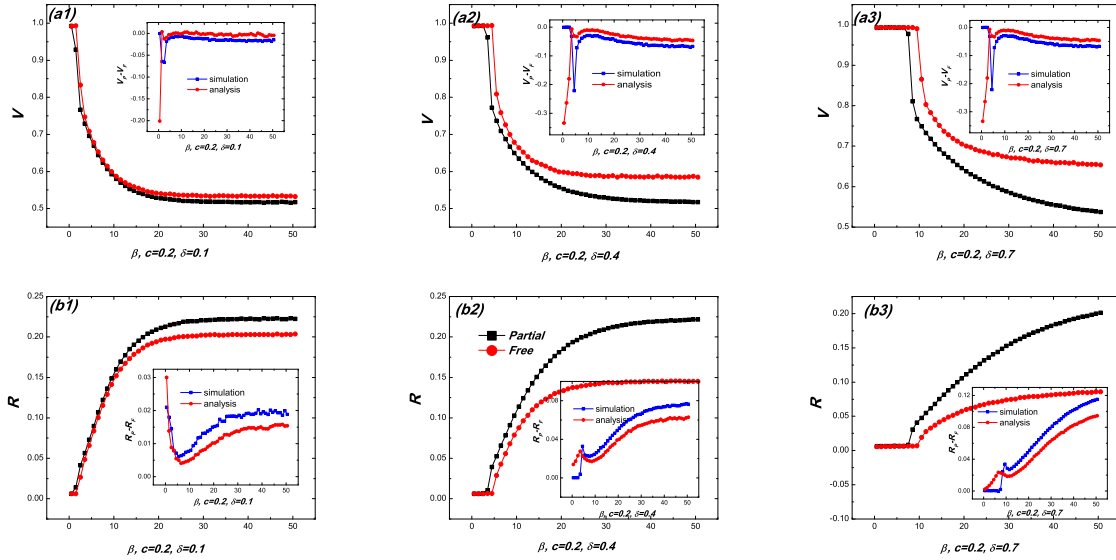

Figure S2: **Impacts of the selection strength  $\beta$  on epidemic dynamics for the Barabási-Albert scale-free networks [3] for small vaccination cost.** Vaccination coverage  $V$  (top panels) and epidemic size  $R$  (bottom panels) under the two subsidy policies for scale-free networks for  $c = 0.2$  and  $\delta = 0.1, 0.4$  and  $0.7$  (corresponding to the left, central, and right panels, respectively). Insets in top and bottom panels show the difference in the vaccination coverage,  $V_P - V_F$ , and the difference in the final epidemic size,  $R_P - R_F$ , respectively, between the two subsidy policies, where the blue squares and red circles are simulation results and mean-field based theoretical prediction (see analysis in **Methods**), respectively. Other parameters are:  $N = 1000$ ,  $\lambda = 0.18$ , and average degree  $\langle k \rangle = 6$ .

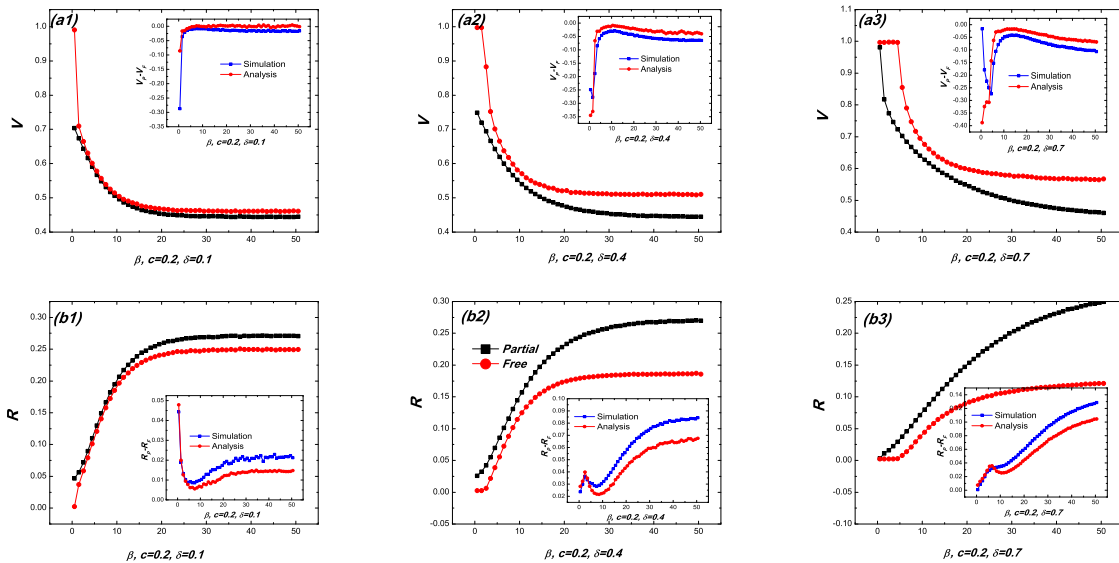

Figure S3: **Quantitative characterization of impacts of the selection strength  $\beta$  on epidemic spreading for partial- and free-subsidy policies for small vaccination cost.** For configuration network [4] (degree distribution  $P(k) \sim k^{-3}$  with network size  $N = 2500$ , minimum degree  $k_{min} = 4$ , and maximal degree  $k_{max} = 50$ .) and cost of vaccination  $c = 0.2$ , vaccination coverage ( $V$ , top panels) and epidemic size ( $R$ , bottom panels) for the two subsidy policies for  $\delta = 0.1, 0.4$  and  $0.7$  (corresponding to the left, central, and right panels, respectively). Insets in the top panels show the difference in the vaccination coverage,  $V_P - V_F$ , between the partial- and free-subsidy policies. Insets in the bottom panels display the difference in epidemic size,  $R_P - R_F$ , between the two subsidy policies. Blue squares in the insets are simulation results, and the red circles are the theoretical predictions based on the mean-field method (see analysis in **Methods**). Other parameters are: transmission rate  $\lambda = 0.15$ ,  $\mu = 0.25$  and average degree  $\langle k \rangle = 8$ .

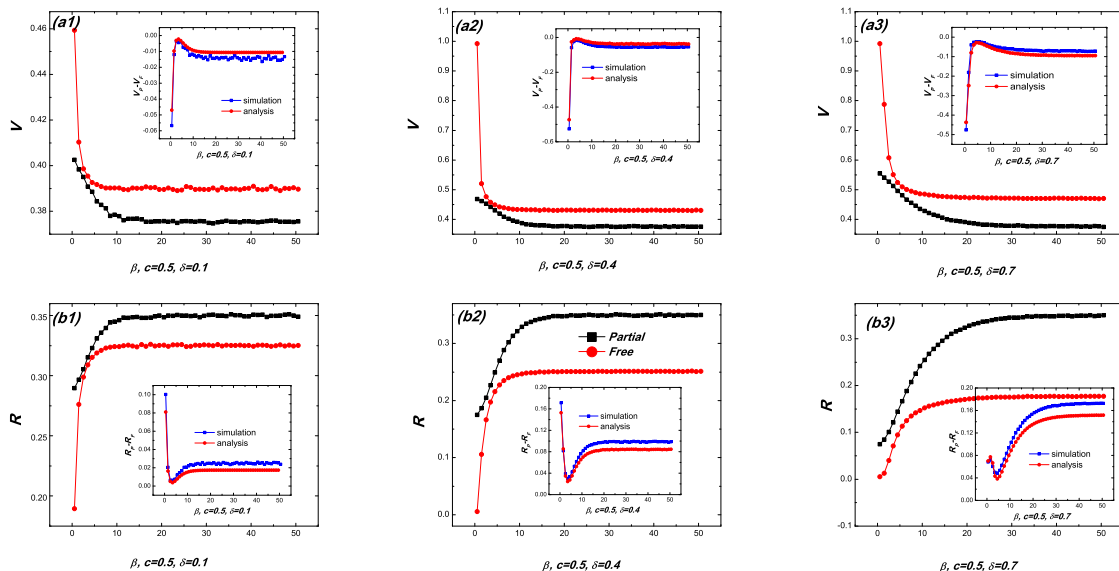

Figure S4: **Quantitative characterization of impacts of the selection strength  $\beta$  on epidemic spreading for partial- and free-subsidy policies for intermediate vaccination cost.** For configuration network and cost of vaccination  $c = 0.5$ , vaccination coverage ( $V$ , top panels) and epidemic size ( $R$ , bottom panels) for the two subsidy policies for  $\delta = 0.1, 0.4$  and  $0.7$  (corresponding to the left, central, and right panels, respectively). Others are the same as for Fig. S3.

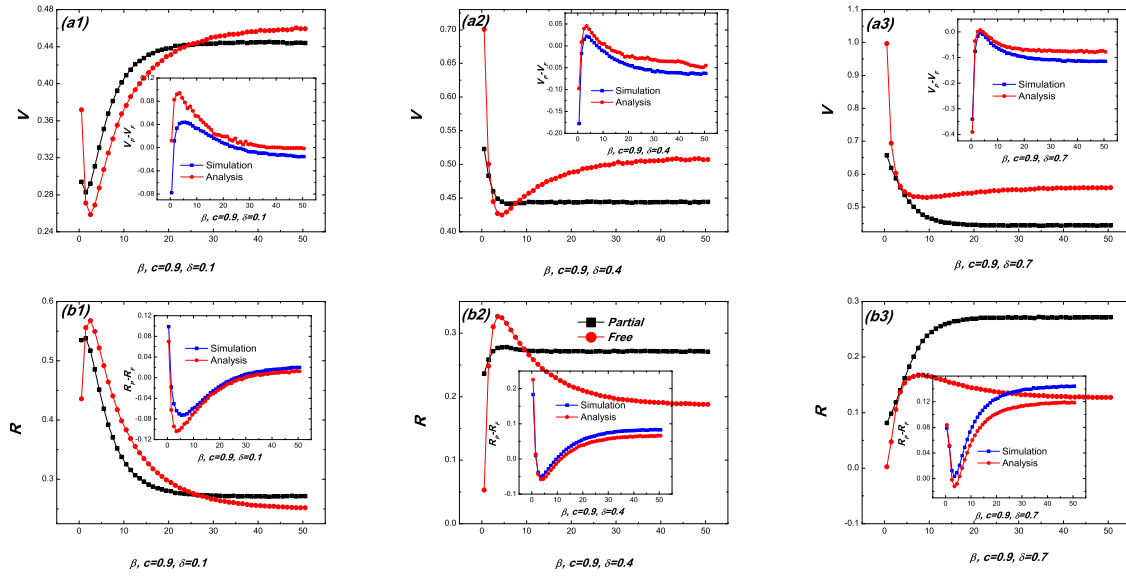

Figure S5: Quantitative characterization of impacts of the selection strength  $\beta$  on epidemic spreading for partial- and free-subsidy policies for large vaccination cost. For configuration network and cost of vaccination  $c = 0.9$ , vaccination coverage ( $V$ , top panels) and epidemic size ( $R$ , bottom panels) for the two subsidy policies for  $\delta = 0.1, 0.4$  and  $0.7$  (corresponding to the left, central, and right panels, respectively). Others are the same as for Fig. S3.
